# Supplementary material for: Mycobacterium tuberculosis PPE32 promotes cytokines production and host cell apoptosis through caspase cascade accompanying with enhanced ER stress response
Source: PubMed Central journal article supplement (PMC5341880; doi:10.18632/oncotarget.12030), 2016-09-15
Supplement: oncotarget-07-67347-s001.pdf [file oncotarget-07-67347-s001.pdf]

## ***Mycobacterium tuberculosis* PPE32 promotes cytokines production and host cell apoptosis through caspase cascade accompanying with enhanced ER stress response**

### Supplementary Materials

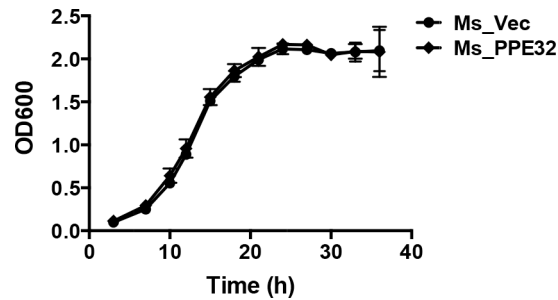

**Supplementary Figure S1: *In vitro* growth of Ms\_Vec and Ms\_PPE32.** Ms\_Vec and Ms\_PPE32 were grown in Middlebrook 7H9 medium supplemented with 0.2% glycerinum, 0.05% Tween 80, 25  $\mu\text{g/ml}$  Kanamycin and 28 mM  $\epsilon$ -caprolactam. The OD600 were determined at an interval of 3 h.

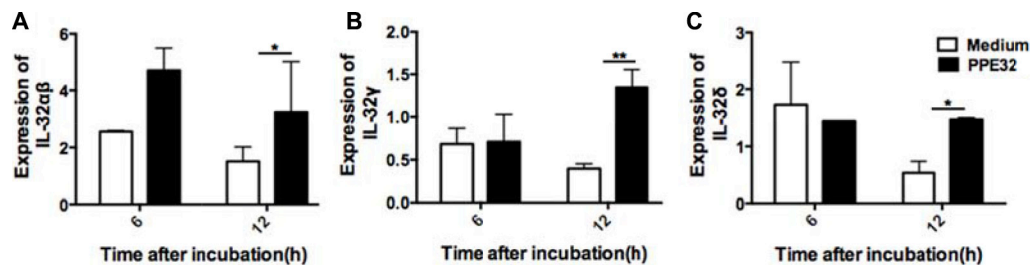

**Supplementary Figure S2: PPE32 induces the expression of IL-32 isoforms in A549 cells.** A549 cells were incubated with 5  $\mu\text{g/ml}$  PPE32 for 6 and 12 h, levels of IL-32 isoform IL-32 $\alpha\beta$  mRNA (A), IL-32 $\gamma$  mRNA (B) and IL-32 $\delta$  mRNA (C) were detected by RT-PCR.

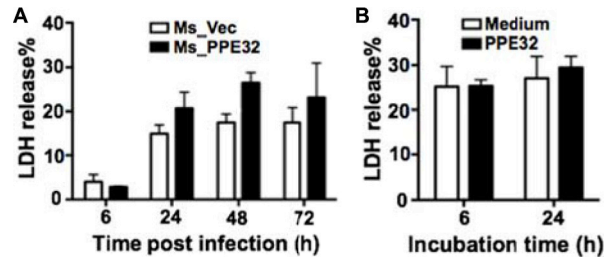

**Supplementary Figure S3: PPE32 has no effect on the necrosis of macrophages.** Culture supernatants were collected from macrophage infected with Ms\_Vec or Ms\_PPE32 at MOI of 10 (A) or incubated with 5  $\mu\text{g/ml}$  PPE32 protein (B). The release of LDH as a measure of macrophage cell death was estimated at various time points. Data are shown as means  $\pm$  SEM of triplicate wells. Similar results were obtained in three independent experiments.

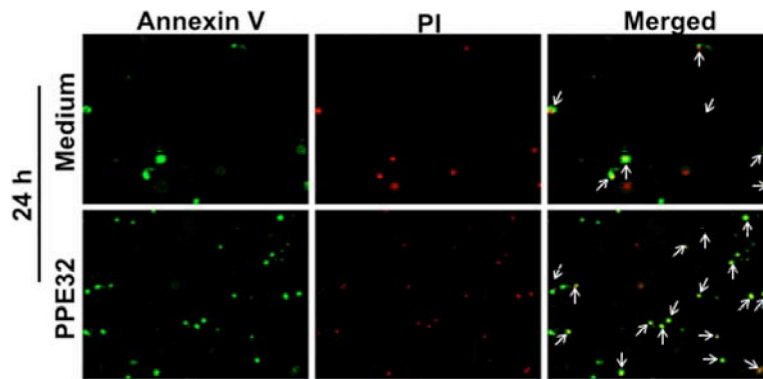

**Supplementary Figure S4: Induction of apoptosis in PPE32 stimulated A549 cells.** A549 cells were incubated with 5  $\mu\text{g/ml}$  PPE32 with different concentration for 24 h, A549 cells were stained by Annexin V/PI and detected the positive cells by fluorescence microscopy.

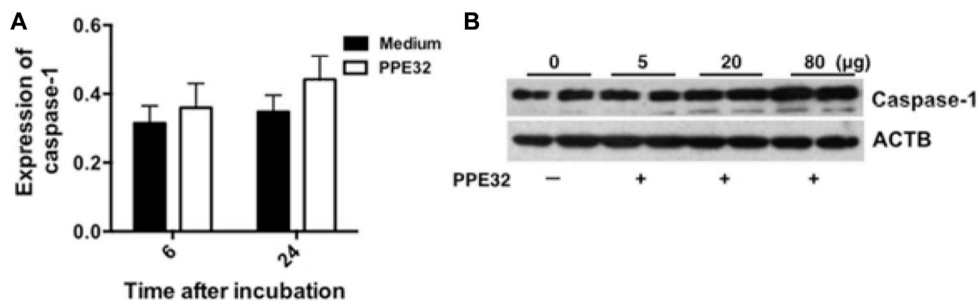

**Supplementary Figure S5: PPE32 promotes the expression of caspase-1 in A549 cells.** (A) A549 cells were incubated with 5  $\mu\text{g/ml}$  PPE32, after 6 and 24 h incubation, the transcription of caspase-1 were detected by RT-PCR. (B) Macrophages were incubated with the different concentration (5, 20, 80  $\mu\text{g/ml}$ ) of PPE32 protein for 24 h. The whole cell lysates were subjected to Western Blot to detect the expression of caspase-1.
